# Supplementary material for: Experiences with facility delivery services within the context of a maternal neonatal health project in Gombe State, Northeast Nigeria A qualitative study
Source: Research Square preprint supplement (doi:10.21203/rs.3.rs-2454705/v1), 2023-01-11
Supplement: Supplementary file 1 [file 2c41c133fb48e311e4971e50.docx]

**Consolidated criteria for reporting qualitative studies (COREQ) checklist for: “Experiences with facility delivery services within the context of a maternal neonatal health project in Gombe State, Northeast Nigeria, A qualitative study”**

| **No.** | **Item** | **Guide Questions/Description** | **Response (and Location in Manuscript where applicable)** |
| --- | --- | --- | --- |
| **Domain 1: Research Team and Reflexivity** | | | |
| Personal Characteristics | | | |
| 1 | Interviewer/facilitator | Which author/s conducted the interview or focus group? | MAM (female Public Health Researcher), with five Research Assistants, and one male Research Assistant conducted the focus groups. (Methods) |
| 2 | Credentials | What were the researcher’s credentials? E.g. PhD, MD | MAM (RN-MPH)  OS (MD, MPH)  BCO (BSc, MPH)  BOO (BPharm, FWACP)  IO (BEng)  AS (MIPH, DTM&H, FMCFM)  JA (MBChB, MPH) |
| 3 | Occupation | What was their occupation at the time of the study? | MAM (Research Consultant, Gates Maternal Neonatal and Child Health Project, SFH)  OS (Monitoring and Evaluation Consultant, Gates Maternal Neonatal and Child Health Project, SFH)  BCO (Project Lead, Gates Maternal Neonatal and Child Health Project, SFH)  BOO (Behavior Change Communication Specialist, Gates Maternal Neonatal and Child Health Project, SFH)  IO (Manager, Measurement and Evaluation ‑ Gates Maternal Neonatal and Child Health Project, SFH)  AS (Executive Secretary, Gombe State Primary Health Care Development Agency)  JA (Deputy Managing Director, Programmes & Operations, SFH) |
| 4 | Gender | Was the researcher male or female? | Female authors: MAM, BO and JA. Male authors: OS, BO, IO and AS. Overall, data analysis team comprised one female and one male: MAM and OS. (Methods- Data collection) |
| 5 | Experience and training | What experience or training did the researcher have? | MAM (Trained; plus 3 years of conducting and analyzing qualitative studies and surveys)  OS: (7 years of conducting qualitative studies)  BCO: (Public health specialist with trainings and experience in behavioural research. Experienced in conducting both quantitative and qualitative studies, particularly on reproductive health behaviour of the vulnerable population.  BOO: (5 research experience in reproductive, maternal and child health)  IO: (6 years of conducting qualitative research)  AS: (Trained in qualitative research at LSTM, Experience conducting qualitative research in sub-Saharan Africa)  JA: (Trained, 20 years conducting and analysing research studies. Multiple PI roles on research) |
| **Relationship with participants** | | | |
| 6 | Relationship established | Was a relationship established prior to study commencement? | No, there was no established relationship with participants prior to study commencement beyond recruitment activities (Methods- Research Team) |
| 7 | Participant knowledge of the interviewer | What did the participants know about the researcher? e.g. personal goals, reasons for doing the research | During orientation to study and consent process, researchers introduced themselves, stating where they worked (with an NGO and not the health facility or government), and reasons for doing the research was to improve the quality of maternal health services in Gombe State. (Methods- Data Collection) |
| 8 | Interviewer characteristics | What characteristics were reported about the interviewer/facilitator? Eg Bias, assumptions, reasons and interests in the research topic | MAM is a female researcher, Nigerian, multilingual, familiar with the religious and cultural context of study setting and interested in research that will generate evidence required to ameliorate health and socio-economic inequalities disproportionately affecting women and children in low resource settings.  The five female Research Assistants were indigenes of Gombe State, multilingual, familiar with the religious and cultural context of the study setting and had at least one-year experience in qualitative data. The one male Research Assistant was an indigene of Gombe State, multilingual, familiar with the religious and cultural context of the study setting and had at least one-year experience in qualitative data. |
| **Domain 2: Study Design** | | | |
| Theoretical Framework | | | |
| 9 | Methodological orientation and Theory | What methodological orientation was stated to underpin the study? e.g. grounded theory, discourse analysis, ethnography, phenomenology, content analysis | Qualitative descriptive study design using a directed approach to content analysis (Methods- study design and Data Analysis) |
| Participant selection | | | |
| 10 | Sampling | How were participants selected? e.g. purposive, convenience, consecutive, snowball | Purposive sampling for all participants. (Methods- Study population) |
| 11 | Method of approach | How were participants approached? e.g. face-to-face, telephone, mail, email | The Three Village Health Workers selected by Society for Family Health verbally invited study eligible women (through phone calls and in person) to participate in the study. (Methods- Study population) |
| 12 | Sample size | How many participants were in the study? | A total of 58 participants in 6 FGDs (Methods –Recruitment) |
| 13 | Non-participation | How many people refused to participate or dropped out? Reasons? | Two participants left the FGD venue before the arrival of FGD facilitators to harvest their farms. (Methods –Recruitment) |
| **Setting** | | | |
| 14 | Setting of data collection | Where was the data collected? e.g. home, clinic, workplace | Data were collected either in out-door or private room within a health facility (all in rural settings) (Methods-Data collection). |
| 15 | Presence of non-participants | Was anyone else present besides the participants and researchers? | No one else was present besides participants and researchers. (Methods- Data Collection) |
| 16 | Description of sample | What are the important characteristics of the sample? e.g. demographic data, date | Study participants were all women residents of rural Gombe State who have utilized the MNH project services. (Methods – Study population) |
| **Data collection** | | | |
| 17 | Interview guide | Were questions, prompts, guides provided by the authors? Was it pilot tested? | FGDs were guided by a semi-structured focus group guide that was reviewed by all co-authors and was translated into Hausa Language. The FGD guide was not pilot tested. (Methods- Data Collection) |
| 18 | Repeat interviews | Were repeat interviews carried out? If yes, how many? | No, repeat interviews of participants were not conducted. (Methods, Data collection) |
| 19 | Audio/visual recording | Did the research use audio or visual recording to collect the data? | FGDs were audio-recorded, and later transcribed. There were no visual recordings. (Methods – Data Collection). |
| 20 | Field notes | Were field notes made during and/or after the interview or focus group? | Yes, an observer made field notes during the FGDs to augment data analysis and interpretation. (Methods- Data Collection) |
| 21 | Duration | What was the duration of the interviews or focus group? | Each FGD took between 40-90 minutes long. (Methods- Data Collection). |
| 22 | Data saturation | Was data saturation discussed? | Data saturation was reached within the six FGDs (Data Collection) |
| 23 | Transcripts returned | Were transcripts returned to participants for comment and/or correction? | No. Over 50% of participants in the study setting could neither read nor write or were not literate enough to be able to read the transcripts. A verbal member check was not performed either, however the diverse and context-experienced facilitators and analyst team and our iterative analysis approach provided robust interpretation. |
| **Domain 3: Analysis and Findings** | | | |
| **Data analysis** | | | |
| 24 | Number of data coders | How many data coders coded the data? | Overall analysis was performed by the first and second authors MAM and OS. (Methods-Data Analysis) |
| 25 | Description of the coding tree | Did authors provide a description of the coding tree? | The coding trees consisted of codes derived from the focus group guide. (Methods- Data Analysis) |
| 26 | Derivation of themes | Were themes identified in advance or derived from the data? | Codes were identified in advance. |
| 27 | Software | What software, if applicable, was used to manage the data? | NVivo 12 (Pro for windows) was used to manage data. |
| 28 | Participant checking | Did participants provide feedback on the findings? | No. Member checks were not performed. |
| **Reporting** | | | |
| 29 | Quotations presented | Were participant quotations presented to illustrate the themes / findings? Was each quotation identified? e.g. participant number | Participant quotations are presented and identified by participant age and group: (Throughout Results section). |
| 30 | Data and findings consistent | Was there consistency between the data presented and the findings? | Yes, discussion on findings was written to align with Results/data presented |
| 31 | Clarity of major themes | Were major themes clearly presented in the findings? | Yes, the three major themes (Perception of facility delivery services; Experience with facility delivery services; Socio-economic factors that limited/discouraged use of facility delivery services; Facility level factors that discouraged use of facility delivery services; and Availability of alternate care discouraged use of facility delivery services) are clearly presented in the results section and figure 1. |
| 32 | Clarity of minor themes | Is there a description of diverse cases or discussion of minor themes? | Yes, emerging minor themes were clearly discussed under each of the major themes. (Results and figure 1) |
