# Supplementary material for: Experiences with facility delivery services within the context of a maternal neonatal health project in Gombe State, Northeast Nigeria A qualitative study
Source: Research Square preprint supplement (doi:10.21203/rs.3.rs-2454705/v1), 2023-01-11
Supplement: Supplementary file 2 [file 74d0aaf9489ae6b5803a822c.xlsx]

## Sheet: Codes
Date	Ward Code	Ward	Age	Ethnicity Code	Ethnicity	Education Code	Education	Occupation Code	Occupation	Religion Code	Religion	Relationship status code	Relationship status code	Polygamy code	Polygamy	No of wives code	No of Wives	No of living children code	Living Child	No of dead children code	Dead Child	Place of last delivery codeCode	Place of last delivery
	1	Akko		1	Fulani	1	No formal schooling	1	Unemployed	1	None	1	Married	1	No	1	2	1	1	1	1	1	Facility
	2	Baganje North		2	Kanuri	2	Vocational Training (sewing, trading)	2	Civil Servant	2	Christianity	2	Never Married	2	Yes	2	3	2	2	2	2	2	Home
	3	Zange		3	Hausa	3	Primary school completed	3	Business/Trade	3	Islam	3	Divorced			3	4	3	3	3	3	3	Other
				4	Boboriga	4	Secondary school / high school completed	4	Professional/Private	4	Other	4	Separated					4	4	4	4
				5	Karekare	5	Informal schooling (Islamic/Bible Schooling)	5	Farming			5	Widowed					5	5	5	5
				6	Wada	6	Some primary schooling	6	Other			6	Other					6	6	6	6
				7	Bolawa	7	Some secondary school / high school											7	7	7	7
				8	Tangale	8	Post-graduate											8	8	8	8
				9	Tera													9	9	9	9

## Sheet: Participant Demographic Info
Participant ID	Age	Ethnicity	Education	Occupation	Religion	Relationship Status	Polygamy	No of Wives	Living Child	Dead Child	No of Facility Delivery	No of Home Delivery	Assisted by a TBA	place of last Delivery	days	weeks	months	days	weeks	months
1	22	8	4	5	2	1	2	1	1	0	1	1	0	1			16			8
2	25	8	4	5	2	1	2	1	2	0	2	0	1	1			6			7
3	30	8	4	1	2	1	2	1	5	2	2	5	2	1			1			2
4	25	8	5	5	2	1	2	1	4	0	4	0	0	1			1			6
5	29	8	7	5	2	1	2	1	4	0	4	0	0	1			1			12
6	35	8	7	5	2	1	2	1	4	3	1	6	1	1			12			19
7	30	8	4	3	2	1	2	1	3	0	2	1	0	1			5			11
8	25	1	1	1	3	1	1	2	4	1	1	4	4	2	0	0	1	0	0	7
9	21	1	3	1	3	1	2	1	1	0	0	1	1	2	0	0	7	0	0	12
10	34	1	1	3	3	1	2	1	6	2	6	2	2	2	0	3	0	0	0	7
11	31	1	6	3	3	1	1	3	5	1	4	2	2	2	0	0	1	0	0	7
12	23	1	1	1	3	1	2	1	3	0	2	1	1	2	0	0	1.5	0	0	7
13	23	1	4	1	3	1	2	1	2	1	2	1	1	2	0	0	5	0	0	11
14	22	1	3	1	3	1	2	1	2	0	1	1	1	2	0	3	0	0	0	6
15	21	1	4	1	3	1	2	1	2	0	1	1	1	2	0	0	1	0	0	6
16	31	1	3	1	3	1	1	2	4	0	1	3	0	2	0	0	3	0	0	12
17	18	2	7	1	3	1	2	1	1	0	0	1	0	2	0	0	2	0	0	6
18	20	3	5	1	3	1	1	2	3	1	4	0	0	1	8	0	0	0	0	5
19	25	1	5	3	3	1	1	2	4	1	5	0	0	1	20	0	0	0	0	6
20	23	2	5	1	3	1	2	1	4	0	3	1	1	2	0	0	8	0	0	12
21	26	1	5	3	3	1	1	3	6	0	6	0	0	1	0	0	8	0	0	14
22	30	1	6	1	3	1	1	2	6	0	6	0	0	1	0	0	5	0	0	10
23	25	1	4	3	3	1	2	1	4	0	4	0	0	1	0	0	3	0	0	9
24	20	1	3	3	3	1	2	1	1	0	1	0	0	1	0	0	9	0	0
25	20	1	4	3	3	1	2	1	1	0	1	0	0	1	0	0	11	0	0	14
26	25	1	5	3	3	1	1	2	3	1	3	1	0	1	0	0	4	0	0	10
27	25	1	1	3	3	1	1	2	5	0	4	1	0	1	0	0	2	0	0	9
28	29	8	4	1	2	1	2	1	4	0	4	0	0	1			8			17
29	30	8	4	1	2	1	2	1	3	0	3	0	0	1			12			2
30	33	8	4	5	2	1	2	1	6	0	6	0	0	1			2			12
31	23	8	4	1	2	1	2	1	2	0	2	0	0	1			2			12
32	35	8	3	5	2	1	2	1	4	0	4	0	0	1			11			24
33	36	8	1	5	2	1	2	1	7	1	7	0	0	1			5			24
34	37	8	6	5	2	1	2	1	7	1	7	0	0	1			1			12
35	30	8	4	5	2	1	2	1	3	1	4	0	0	1			11			12
36	30	8	6	5	2	1	2	1	6	1	7	0	0	1			8			24
37	25	8	7	1	2	1	2	1	2	1	3	0	0	1		3				9
38	27	8	4	1	2	1	2	1	2	0	2	0	0	1			7			16
39	20	4	1	1	3	1	1	2	1	2	2	1	1	1			1			24
40	15	4	1	1	3	1	2	1	1	0	1	0	0	1			4			12
41	24	1	6	1	3	1	1	2	3	1	4	0	0	1			12			12
42	20	5	1	1	3	1	2	1	1	0	1	0	0	1						24
43	18	4	1	1	3	1	2	1	1	0	1	0	0	1			7			14
44	24	1	4	4	3	1	2	1	3	1	4	0	0	1			4			24
45	25	6	4	1	3	1	1	2	4	0	1	3	3	1			6			10
46	20	7	6	1	3	1	1	2	3	0	2	1	1	1			7			12
47	30	7	3	1	3	1	1	2	8	0	3	5	5	1			3			9
48	15	3	6	1	3	1	2	1	1	0	1	0	0	1			2			12
49	20	5	5	3	3	1	1	3	6	0	0	6	6	2			8			12
50	25	1	5	1	3	1	2	1	2	3	1	4	4	2			3			12
51	28	5	5	3	3	1	1	4	8	1	0	9	9	2			4			12
52	18	7	5	1	3	1	2	1	2	0	0	2	2	2			4			18
54	28	5	6	3	3	1	2	1	5	2	0	5	5	2			6			18
55	20	1	5	3	3	1	2	1	3	1	0	4	4	2			6			18
56	25	9	5	1	3	1	1	3	2	0	0	2	2	2			11			18
57	25	4	5	3	3	1	1	2	4	0	0	4	4	2			4			12
58	22	3	5	3	3	1	1	2	3	0	0	3	3	2			7			18
59	15	5	5	1	3	1	2	1	2	0	0	2	2	2			10			12
